# Supplementary material
Source: Springer Nature journal article supplement (https://www.springermedizin.de/resource/supplementary/12936_2013_3025_MOESM4_ESM.pdf/9544848)
Supplement: MOESM4 [file 9544848]

Additional file 4: Alignment of cloned *Ace-1* sequences from two G/S heterozygote (C11 and C12; diagnosed by TaqMan) and from direct sequencing of Taqman SS homozygote samples from the present study and from a previous collection from Madina (Accra) in 2008.

```

C11A      GACGCGGTCTGACGAGGCGCGAGTCAAACCTCGGGTAAGTACGCGATTGGA 50
C11B      GACGCGGTCTGACGAGGCGCGAGTCAAACCTCGGGTAAGTACGCGATTGGA 50
C11C      GACGCGGTCTGACGAGGCGCGAGTCAAACCTCGGGTAAGTACGCGATTGGA 50
C12A      GACGCGGTCTGACGAGGCGCGAGTCAAACCTCGGGTAAGTACGCGATTGGA 50
C12B      GACGCGGTCTGACGAGGCGCGAGTCAAACCTCGGGTAAGTACGCGATTGGA 50
C12C      GACGCGGTCTGACGAGGCGCGAGTCAAACCTCGGGTAAGTACGCGATTGGA 50
Madina_2008_Ser_homozygote  GACGCGGTCTGACGAGGCGCGAGTCAAACCTCGGGTAAGTACGCGATTGGA 50
Direct_seq_Ser_homozygotes  GACGCGGTCTGACGAGGCGCGAGTCAAACCTCGGGTAAGTACGCGATTGGA 50
*****

C11A      AGTGGGGGACGTTTACCTACCGTGTACTACAACGCACCTTTACCCCCAC 100
C11B      AGTGGGGGACGTTTACCTACCGTGTACTACAACGCACCTTTACCCCCAC 100
C11C      AGTGGGGGACGTTTACCTACCGTGTACTACAACGCACCTTTACCCCCAC 100
C12A      AGTGGGGGACGTTTACCTACCGTGTACTACAACGCACCTTTACCCCCAC 100
C12B      AGTGGGGGACGTTTACCTACCGTGTACTACAACGCACCTTTACCCCCAC 100
C12C      AGTGGGGGACGTTTACCTACCGTGTACTACAACGCACCTTTACCCCCAC 100
Madina_2008_Ser_homozygote  AGTGGGGGACGTTTACCTACCGTGTACTACAACGCACCTTTACCCCCAC 100
Direct_seq_Ser_homozygotes  AGTGGGGGACGTTTACCTACCGTGTACTACAACGCACCTTTACCCCCAC 100
*****

C11A      GCACACGCACCGGCAGACGCGAACGACAACGATCCGCTGGTGGTCAACAC 150
C11B      GCACACGCACCGGCAGACGCGAACGACAACGATCCGCTGGTGGTCAACAC 150
C11C      GCACACGCACCGGCAGACGCGAACGACAACGATCCGCTGGTGGTCAACAC 150
C12A      GCACACGCACCGGCAGACGCGAACGACAACGATCCGCTGGTGGTCAACAC 150
C12B      GCACACGCACCGGCAGACGCGAACGACAACGATCCGCTGGTGGTCAACAC 150
C12C      GCACACGCACCGGCAGACGCGAACGACAACGATCCGCTGGTGGTCAACAC 150
Madina_2008_Ser_homozygote  GCACACGCACCGGCAGACGCGAACGACAACGATCCGCTGGTGGTCAACAC 150
Direct_seq_Ser_homozygotes  GCACACGCACCGGCAGACGCGAACGACAACGATCCGCTGGTGGTCAACAC 150
*****

C11A      GGATAAGGGGCGCATCCGCGGCATTACGGTTCGATGCGCCCAGCGGCAAGA 200
C11B      GGATAAGGGGCGCATCCGCGGCATTACGGTTCGATGCGCCCAGCGGCAAGA 200
C11C      GGATAAGGGGCGCATCCGCGGCATTACGGTTCGATGCGCCCAGCGGCAAGA 200
C12A      GGATAAGGGGCGCATCCGCGGCATTACGGTTCGATGCGCCCAGCGGCAAGA 200
C12B      GGATAAGGGGCGCATCCGCGGCATTACGGTTCGATGCGCCCAGCGGCAAGA 200
C12C      GGATAAGGGGCGCATCCGCGGCATTACGGTTCGATGCGCCCAGCGGCAAGA 200
Madina_2008_Ser_homozygote  GGATAAGGGGCGCATCCGCGGCATTACGGTTCGATGCGCCCAGCGGCAAGA 200
Direct_seq_Ser_homozygotes  GGATAAGGGGCGCATCCGCGGCATTACGGTTCGATGCGCCCAGCGGCAAGA 200
*****

C11A      AGGTGGACGTGTGGCTCGGCATTCCCTACGCCAGCCGCCGGTCGGGCCG 250
C11B      AGGTGGACGTGTGGCTCGGCATTCCCTACGCCAGCCGCCGGTCGGGCCG 250
C11C      AGGTGGACGTGTGGCTCGGCATTCCCTACGCCAGCCGCCGGTCGGGCCG 250
C12A      AGGTGGACGTGTGGCTCGGCATTCCCTACGCCAGCCGCCGGTCGGGCCG 250
C12B      AGGTGGACGTGTGGCTCGGCATTCCCTACGCCAGCCGCCGGTCGGGCCG 250
C12C      AGGTGGACGTGTGGCTCGGCATTCCCTACGCCAGCCGCCGGTCGGGCCG 250
Madina_2008_Ser_homozygote  AGGTGGACGTGTGGCTCGGCATTCCCTACGCCAGCCGCCGGTCGGGCCG 250
Direct_seq_Ser_homozygotes  AGGTGGACGTGTGGCTCGGCATTCCCTACGCCAGCCGCCGGTCGGGCCG 250
*****

C11A      CTACGGTTCCGTCATCCGCGGCCGGCCGAAAAGTGGACCGGCGTGTGAA 300
C11B      CTACGGTTCCGTCATCCGCGGCCGGCCGAAAAGTGGACCGGCGTGTGAA 300
C11C      CTACGGTTCCGTCATCCGCGGCCGGCCGAAAAGTGGACCGGCGTGTGAA 300
C12A      CTACGGTTCCGTCATCCGCGGCCGGCCGAAAAGTGGACCGGCGTGTGAA 300
C12B      CTACGGTTCCGTCATCCGCGGCCGGCCGAAAAGTGGACCGGCGTGTGAA 300
C12C      CTACGGTTCCGTCATCCGCGGCCGGCCGAAAAGTGGACCGGCGTGTGAA 300
Madina_2008_Ser_homozygote  CTACGGTTCCGTCATCCGCGGCCGGCCGAAAAGTGGACCGGCGTGTGAA 300
Direct_seq_Ser_homozygotes  CTACGGTTCCGTCATCCGCGGCCGGCCGAAAAGTGGACCGGCGTGTGAA 300
*****

C11A      CACGACCACACCGCCCAACAGCTGCGTGCAGATCGTGGACACCGTGTTCG 350
C11B      CACGACCACACCGCCCAACAGCTGCGTGCAGATCGTGGACACCGTGTTCG 350
C11C      CACGACCACACCGCCCAACAGCTGCGTGCAGATCGTGGACACCGTGTTCG 350
C12A      CACGACCACACCGCCCAACAGCTGCGTGCAGATCGTGGACACCGTGTTCG 350
C12B      CACGACCACACCGCCCAACAGCTGCGTGCAGATCGTGGACACCGTGTTCG 350
C12C      CACGACCACACCGCCCAACAGCTGCGTGCAGATCGTGGACACCGTGTTCG 350
Madina_2008_Ser_homozygote  CACGACCACACCGCCCAACAGCTGCGTGCAGATCGTGGACACCGTGTTCG 350
Direct_seq_Ser_homozygotes  CACGACCACACCGCCCAACAGCTGCGTGCAGATCGTGGACACCGTGTTCG 350
*****

```

C11A GCGACTTCCC GGCGCGACCATGTGGAACCCGAACACGCCCCTGTCCGAG 400  
C11B GCGACTTCCC GGCGCGACCATGTGGAACCCGAACACGCCCCTGTCCGAG 400  
C11C GCGACTTCCC GGCGCGACCATGTGGAACCCGAACACGCCCCTGTCCGAG 400  
C12A GCGACTTCCC GGCGCGACCATGTGGAACCCGAACACGCCCCTGTCCGAG 400  
C12B GCGACTTCCC GGCGCGACCATGTGGAACCCGAACACGCCCCTGTCCGAG 400  
C12C GCGACTTCCC GGCGCGACCATGTGGAACCCGAACACGCCCCTGTCCGAG 400  
Madina\_2008\_Ser\_homozygote GCGACTTCCC GGCGCGACCATGTGGAACCCGAACACGCCCCTGTCCGAG 400  
Direct\_seq\_Ser\_homozygotes GCGACTTCCC GGCGCGACCATGTGGAACCCGAACACGCCCCTGTCCGAG 400  
\*\*\*\*\*

C11A GACTGTCTGTACATTAACGTGGTGGCACCGCGGCCCGGCCAAGAATGC 450  
C11B GACTGTCTGTACATTAACGTGGTGGCACCGCGGCCCGGCCAAGAATGC 450  
C11C GACTGTCTGTACATTAACGTGGTGGCACCGCGGCCCGGCCAAGAATGC 450  
C12A GACTGTCTGTACATTAACGTGGTGGCACCGCGGCCCGGCCAAGAATGC 450  
C12B GACTGTCTGTACATTAACGTGGTGGCACCGCGGCCCGGCCAAGAATGC 450  
C12C GACTGTCTGTACATTAACGTGGTGGCACCGCGGCCCGGCCAAGAATGC 450  
Madina\_2008\_Ser\_homozygote GACTGTCTGTACATTAACGTGGTGGCACCGCGGCCCGGCCAAGAATGC 450  
Direct\_seq\_Ser\_homozygotes GACTGTCTGTACATTAACGTGGTGGCACCGCGGCCCGGCCAAGAATGC 450  
\*\*\*\*\*

C11A GGCCGTCATGCTGTGGATCTTCGGCGGCAGCTTCTACTCCGGCACCGCCA 500  
C11B GGCCGTCATGCTGTGGATCTTCGGCGGCAGCTTCTACTCCGGCACCGCCA 500  
C11C GGCCGTCATGCTGTGGATCTTCGGCGGCAGCTTCTACTCCGGCACCGCCA 500  
C12A GGCCGTCATGCTGTGGATCTTCGGCGGCAGCTTCTACTCCGGCACCGCCA 500  
C12B GGCCGTCATGCTGTGGATCTTCGGCGGCAGCTTCTACTCCGGCACCGCCA 500  
C12C GGCCGTCATGCTGTGGATCTTCGGCGGCAGCTTCTACTCCGGCACCGCCA 500  
Madina\_2008\_Ser\_homozygote GGCCGTCATGCTGTGGATCTTCGGCGGCAGCTTCTACTCCGGCACCGCCA 500  
Direct\_seq\_Ser\_homozygotes GGCCGTCATGCTGTGGATCTTCGGCGGCAGCTTCTACTCCGGCACCGCCA 500  
\*\*\*\*\*

C11A CCCTGGACGTGTACGACCACCGGGCGCTTGCCTCGGAGGAGAACGTGATC 550  
C11B CCCTGGACGTGTACGACCACCGGGCGCTTGCCTCGGAGGAGAACGTGATC 550  
C11C CCCTGGACGTGTACGACCACCGGGCGCTTGCCTCGGAGGAGAACGTGATC 550  
C12A CCCTGGACGTGTACGACCACCGGGCGCTTGCCTCGGAGGAGAACGTGATC 550  
C12B CCCTGGACGTGTACGACCACCGGGCGCTTGCCTCGGAGGAGAACGTGATC 550  
C12C CCCTGGACGTGTACGACCACCGGGCGCTTGCCTCGGAGGAGAACGTGATC 550  
Madina\_2008\_Ser\_homozygote CCCTGGACGTGTACGACCACCGGGCGCTTGCCTCGGAGGAGAACGTGATC 550  
Direct\_seq\_Ser\_homozygotes CCCTGGACGTGTACGACCACCGGGCGCTTGCCTCGGAGGAGAACGTGATC 550  
\*\*\*\*\*

C11A GTGGTGTGCGTGCAGTACCGCGTGGCCAGTCTGGGCTTCTGTCTTCTCGG 600  
C11B GTGGTGTGCGTGCAGTACCGCGTGGCCAGTCTGGGCTTCTGTCTTCTCGG 600  
C11C GTGGTGTGCGTGCAGTACCGCGTGGCCAGTCTGGGCTTCTGTCTTCTCGG 600  
C12A GTGGTGTGCGTGCAGTACCGCGTGGCCAGTCTGGGCTTCTGTCTTCTCGG 600  
C12B GTGGTGTGCGTGCAGTACCGCGTGGCCAGTCTGGGCTTCTGTCTTCTCGG 600  
C12C GTGGTGTGCGTGCAGTACCGCGTGGCCAGTCTGGGCTTCTGTCTTCTCGG 600  
Madina\_2008\_Ser\_homozygote GTGGTGTGCGTGCAGTACCGCGTGGCCAGTCTGGGCTTCTGTCTTCTCGG 600  
Direct\_seq\_Ser\_homozygotes GTGGTGTGCGTGCAGTACCGCGTGGCCAGTCTGGGCTTCTGTCTTCTCGG 600  
\*\*\*\*\*

C11A CACCCCGAAGCGCCGGGCAATGCGGGACTGTTTCGATCAGAACCTTGCGC 650  
C11B CACCCCGAAGCGCCGGGCAATGCGGGACTGTTTCGATCAGAACCTTGCGC 650  
C11C CACCCCGAAGCGCCGGGCAATGCGGGACTGTTTCGATCAGAACCTTGCGC 650  
C12A CACCCCGAAGCGCCGGGCAATGCGGGACTGTTTCGATCAGAACCTTGCGC 650  
C12B CACCCCGAAGCGCCGGGCAATGCGGGACTGTTTCGATCAGAACCTTGCGC 650  
C12C CACCCCGAAGCGCCGGGCAATGCGGGACTGTTTCGATCAGAACCTTGCGC 650  
Madina\_2008\_Ser\_homozygote CACCCCGAAGCGCCGGGCAATGCGGGACTGTTTCGATCAGAACCTTGCGC 650  
Direct\_seq\_Ser\_homozygotes CACCCCGAAGCGCCGGGCAATGCGGGACTGTTTCGATCAGAACCTTGCGC 650  
\*\*\*\*\*

C11A TACGGTAGGTGTCTTTGCGTGTGTCTGTAGTTATAGTATTCTAACGAG 700  
C11B TACGGTAGGTGTCTTTGCGTGTGTCTGTAGTTATAGTATTCTAACGAG 700  
C11C TACGGTAGGTGTCTTTGCGTGTGTCTGTAGTTATAGTATTCTAACGAG 700  
C12A TACGGTAGGTGTCTTTGCGTGTGTCTGTAGTTATAGTATTCTAACGAG 700  
C12B TACGGTAGGTGTCTTTGCGTGTGTCTGTAGTTATAGTATTCTAACGAG 700  
C12C TACGGTAGGTGTCTTTGCGTGTGTCTGTAGTTATAGTATTCTAACGAG 700  
Madina\_2008\_Ser\_homozygote TACGGTAGGTGTCTTTGCGTGTGTCTGTAGTTATAGTATTCTAACGAG 700  
Direct\_seq\_Ser\_homozygotes TACGGTAGGTGTCTTTGCGTGTGTCTGTAGTTATAGTATTCTAACGAG 700  
\*\*\*\*\*

C11A GTGCTCTTCTTCCCATCACTTCTTGGGAGTCAGCTGGGTGCGGG 744  
C11B GTGCTCTTCTTCCCATCACTTCTTGGGAGTCAGCTGGGTGCGGG 744  
C11C GTGCTCTTCTTCCCATCACTTCTTGGGAGTCAGCTGGGTGCGGG 744  
C12A GTGCTCTTCTTCCCATCACTTCTTGGGAGTCAGCTGGGTGCGGG 744  
C12B GTGCTCTTCTTCCCATCACTTCTTGGGAGTCAGCTGGGTGCGGG 744  
C12C GTGCTCTTCTTCCCATCACTTCTTGGGAGTCAGCTGGGTGCGGG 744  
Madina\_2008\_Ser\_homozygote GTGCTCTTCTTCCCATCACTTCTTGGGAGTCAGCTGGGTGCGGG 744  
Direct\_seq\_Ser\_homozygotes GTGCTCTTCTTCCCATCACTTCTTGGGAGTCAGCTGGGTGCGGG 744

Direct\_seq\_Ser\_homozygotes

GTGCTCTTCTCCCATCACTTCTTGGGAGTCAGCTGGGTGCGGG 744  
\*\*\*\*\*
